1 Running title: No independent division machinery in thylakoids

2

3 Corresponding author details: Steven M. Theg, Department of Plant Biology, University of  
4 California Davis, Davis, CA 95616

5

6

7

8

9

10

11 **Characterization of Thylakoid Division Using Chloroplast Dividing**  
12 **Mutants in *Arabidopsis***

13

14 Jonathan Ho, Warren Kwan, Vivian Li, and Steven M. Theg<sup>1</sup>

15

16 Department of Plant Biology, University of California Davis, Davis, CA, 95616

17

18

19

20 Summary: Chloroplasts unable to divide possess giant thylakoids suggesting that thylakoids do  
21 not possess independent division machinery

22

23

---

Author Contributions: JH and SMT designed experiments. JH, WK and VL performed the experiments and all authors analyzed the data. JH and SMT wrote the article and all authors approved it.

Funding information: This work was funded by the Division of Chemical Sciences, Geosciences, and Biosciences, Office of Basic Energy Sciences of the US Department of Energy through Grant DE-FG02-03ER15405.

<sup>1</sup> Address correspondence to [smtheg@ucdavis.edu](mailto:smtheg@ucdavis.edu).

24 **Abstract:**

25 Chloroplasts are double membrane bound organelles that are found in plants and algae. Their  
26 division requires a number of proteins to assemble into rings along the center of the organelle  
27 and to constrict in synchrony. Chloroplasts possess a third membrane system, the thylakoids,  
28 which house the majority of proteins responsible for the light-dependent reactions. The  
29 mechanism that allows chloroplasts to sort out and separate the intricate thylakoid membrane  
30 structures during organelle division remain unknown. By characterizing the sizes of thylakoids  
31 found in a number of different chloroplast division mutants in *Arabidopsis*, we show that  
32 thylakoids do not divide independently of the chloroplast division cycle. More specifically, we  
33 show that thylakoid division requires the formation of both the inner and the outer contractile  
34 rings of the chloroplast.

35

36

37 **Introduction:**

38

39 Chloroplasts are bound by outer and inner envelope membranes which enclose an  
40 additional compartment called the thylakoid. Specialized to capture the light energy available in  
41 sunlight and convert it into ATP and NADPH, thylakoids are responsible for the production of  
42 most of the oxygen in the Earth's atmosphere.

43 Structurally, thylakoids appear as an intricate network of columns of stacked discs,  
44 termed grana, interconnected by unstacked regions called stromal lamellae. This architectural  
45 complexity is further highlighted by the location of different proteins complexes within the  
46 different thylakoid regions. Photosystem II and the light-harvesting complex II trimer are found  
47 in the granal regions of the thylakoid, whereas the photosystem I - light harvesting complex I  
48 supercomplex and the ATP synthetase are found in the stromal lamellae; the cytochrome b6/f  
49 complex is located in both (Boardman et al., 1966; Boekema et al., 2000; van Roon et al., 2000;  
50 Daum et al., 2010). Spectroscopic studies , electron microscopy (Hesloparrison, 1963; Paolillo  
51 and Falk, 1966; Schoenknecht et al., 1990) and more recently, electron tomography (Shimoni et  
52 al., 2005; Daum et al., 2010; Austin and Staehelin, 2011) have shown that the thylakoid system  
53 within a single chloroplast consists of a single vesicle with its membrane intricately folded upon  
54 itself. A number of proteins, such as Thf1, VIPP1, FtsZ and FZL were shown to be essential for  
55 the development and maintenance of thylakoid structure (Kroll et al., 2001; Wang et al., 2004;  
56 Gao et al., 2006; El-Kafari et al., 2008; Karamoko et al., 2011; Lo and Theg, 2012). The  
57 mechanism that allows chloroplasts to sort and separate the intricate structures of the thylakoid  
58 membrane during organelle division remain unknown.

59 Chloroplasts division requires a multitude of proteins to assemble into rings along the  
60 center of the organelle and to constrict in synchrony (Maple-Grodem and Raynaud, 2014;

61 Osteryoung and Pyke, 2014). The first ring that forms involves the stromal protein FtsZ  
62 interacting with Arc6, a protein found in the inner envelope membrane (McAndrew et al., 2001;  
63 Vitha et al., 2003). Arc6 has also been shown to interact with PDV2 in the outer envelope, which  
64 along with PDV1, recruits DRP5 or Arc 5, a dynamin-related protein that forms a contractile ring  
65 along the cytoplasmic side of the chloroplast (Yoshida et al., 2006; Glynn et al., 2008). FtsZ1  
66 and isoforms of FtsZ2 in *Arabidopsis* have been found to associate with the thylakoid membrane  
67 in a developmentally dependent manner (El-Kafafi et al., 2008; Karamoko et al., 2011). While  
68 this is consistent with the involvement of these proteins with thylakoid division, this remains a  
69 matter of speculation.

70         The separation of thylakoids during chloroplast division has been captured in electron  
71 micrographs by a number of different groups (Leech et al., 1981; Oross and Possingham, 1989;  
72 Robertson et al., 1996). Images show thylakoids dispersed throughout the chloroplast in the early  
73 stages of plastid division. As division proceeds, the number of thylakoid grana and stromal  
74 lamellae that extend across the length of the original plastid dwindles until a single segment  
75 spans the isthmus of the constricted plastid. At the final stages of plastid division, the thylakoid  
76 membrane along with one of the daughter organelles appear to be twisted so that the thylakoid  
77 membrane loses its longitudinal orientation (Robertson et al., 1996). Thylakoid division appears  
78 to precede the separation of the daughter organelles (Whatley, 1980). The mechanism of  
79 thylakoid division, and its reliance on the chloroplast division cycle remain unknown. In this  
80 study we dissect the dependence of thylakoid division on the chloroplast division machinery by  
81 comparing the sizes of thylakoids found in chloroplast division mutants that are arrested at  
82 different states of plastid division.

83

## 84 **Results:**

### 85 **Experimental theory and design**

86 Wild type *Arabidopsis* plants possess ~ 120 chloroplasts per mesophyll cell, each with a  
87 single thylakoid membrane (Pyke and Leech, 1994). The composition of thylakoids from  
88 chloroplast mutants that are unable to divide is unknown. We first examined the effect of the  
89 lack of an inner contractile ring on the division of thylakoids. The chloroplast division mutant,  
90 *arc6*, has a premature stop codon near the amino-terminal region of the protein, thereby  
91 preventing the formation of an inner contractile ring and rendering the plastid incapable of  
92 division (Vitha et al., 2003). As a result, the mutant plant possess giant-sized chloroplasts (Pyke  
93 et al., 1994). We reasoned that there are two possible scenarios that can describe the fate of the  
94 thylakoids in *arc6* mutants. In the first, we assume that the thylakoids in the *arc6* chloroplasts  
95 are still capable of undergoing division independent of the chloroplast division cycle. As a result,  
96 the number and size of the thylakoids within the giant *arc6* chloroplasts will likely be similar to  
97 those found in wild-type cells. In the second scenario, we assume that the *arc6* thylakoids cannot  
98 divide independently of the chloroplast division cycle. Accordingly, the *arc6* chloroplasts would  
99 possess a single giant-sized thylakoid.

100 We sought to determine the relative sizes of the thylakoids in *arc6* and wild type  
101 chloroplasts by measuring the sensitivity of the ionic conductivity of the thylakoid membrane to  
102 the pore-forming ionophore gramicidin. This experiment, originally performed by  
103 (Schoenknecht et al., 1990), is based on the ability of a small number of gramicidin pores to  
104 short circuit the capacitance of a thylakoid membrane vesicle. Titration of the membrane  
105 capacitance with gramicidin will report on the size of the thylakoid electrical unit, with larger  
106 thylakoids being more readily short-circuited by a given concentration of ionophore than smaller

107 thylakoids. The conductivity of the thylakoid membrane can be conveniently and non-invasively  
108 monitored via the well-characterized decay of the carotenoid electrochromic shift at 520 nm  
109 induced by a short pulse of light (Junge and Witt, 1968; Witt, 1979; Bailleul et al., 2011). By  
110 this technique it was determined that the size of the thylakoid electrical unit within chloroplasts  
111 corresponds to all the photosynthetically active membranes within each plastid; that is, there is  
112 essentially one thylakoid per chloroplast (Schoenknecht et al. 1990). This conclusion has been  
113 confirmed by TEM micrographs of serially sectioned plastids (Hesloparrison, 1963; Paolillo  
114 and Falk, 1966; Mustardy and Janossy, 1979), and more recently, by electron tomography  
115 (Nierzwicki-Bauer et al., 1983; Shimoni et al., 2005; Mustardy et al., 2008; Austin and Staehelin,  
116 2011; Daum and Kuhlbrandt, 2011).

117

### 118 **The electrical unit in *arc6* chloroplasts is larger than that in wild-type chloroplasts**

119

120 It would be expected that large thylakoid vesicles potentially formed in giant chloroplasts  
121 might be susceptible to disruption by shear forces applied during isolation. In order to minimize  
122 this possibility, protoplasts were made from both wild type and *arc6* plants and chloroplasts were  
123 subsequently isolated therefrom. Figure 1 shows that despite the expectation that the giant single  
124 chloroplasts present in the *arc6* mutants would be even more fragile than those in the wild type,  
125 they could be isolated intact from protoplasts by incubation in a carbonate-containing buffer.  
126 This is, to our knowledge, the first successful isolation of these giant chloroplasts with their  
127 envelopes intact.

128 We then probed the size of the thylakoid electrical units via the light-induced carotenoid  
129 electrochromic signal at 520 nm. After a 9 ms light pulse, the  $\Delta\Psi$ -indicating  $\Delta A_{520}$  nm signal  
130 exhibited biphasic relaxation kinetics in both wild type and *arc6* plastids. *Arc6* chloroplasts

131 displayed a faster  $\Delta\psi$  relaxation rate than the wild type even in the absence of ionophore (Figure  
132 2A-B). The addition of gramicidin to the chloroplasts resulted in an accelerated relaxation rate  
133 of the  $\Delta A_{520}$  nm signal in both wild type and *arc6* samples (Figure 2A-B), with increasing  
134 concentrations resulting in faster decays. This was also conveniently manifested in the initial  
135 point recorded as the 9 ms actinic pulse was turned off. Since a 9 ms pulse is not a single  
136 turnover flash, the magnitude of the electric field measured at 9 ms results from competition  
137 between field generation by multiple reaction center excitations and decay by ion counter  
138 movement, the latter of which is accelerated by gramicidin. Accordingly, thylakoid membranes  
139 with increased ion permeability display a lower magnitude of the  $\Delta A_{520}$  nm signal at 9 ms.  
140 Acceleration of the electrochromic shift decay can be clearly seen by plotting the magnitude of  
141 the 9 ms  $\Delta A_{520}$  nm absorbance as a function of the logarithm of the gramicidin concentration  
142 (Figure 2C). This plot reveals the increased sensitivity of the thylakoid conductance to  
143 gramicidin exhibited by *arc6* chloroplasts over those from wild-type plants, and indicates that the  
144 thylakoids are larger in the *arc6* mutant.

#### 145 ***Arc6* chloroplasts possess giant thylakoids**

146

147 When isolated protoplasts are placed in very low osmotic conditions, the plasma  
148 membrane and the chloroplast outer and inner envelope membranes break, resulting in the  
149 release of the thylakoids (Mercer, 1954; Weier et al., 1965; Hinnah and Wagner, 1998).  
150 However, thylakoid membranes are more resilient to osmotic pressure than the rest of the cell's  
151 membranes, and thylakoids swell to form blebs. We used this property of thylakoids to provide  
152 an independent measurement of the size of wild type and *arc6* thylakoids. In the confocal  
153 microscope, chlorophyll autofluorescence serves as a marker for thylakoid membranes (Figure

154 3). Figure 3B shows a representative cross section image of a bleb formed from *arc6* thylakoids,  
155 and it is apparent that it is significantly larger than those formed from wild-type thylakoids  
156 (Figure 3A). The diameter of the wild type bleb (Figure 3A) is  $\sim 12.8 \pm 3.9 \mu\text{m}$ , whereas the  
157 *arc6* bleb (Figure 3B) diameter averages  $21.7 \pm 11.2 \mu\text{m}$ . While the diameter of a spherical  
158 object such as a bleb observed in a single cross section could be mistakenly underestimated by  
159 examining an image off of the equatorial plane, those images in Fig. 3 were produced after  
160 scanning back and forth through the z-plane to find the maximum observed diameters.  
161 Representative z-projections, in which all z-plane images are stacked one upon each other,  
162 confirm the dramatic difference in sizes between *arc6* and wild type blebs (Figure 4A-B).

163 The values in Table 4.1 report the average diameters of 1000 bleb samples. There was,  
164 however, a remarkable variation in the sizes of the blebs formed from these (and other) plants,  
165 and this is seen clearly in the diameter distribution histograms in Figure 5A. The possible  
166 origins of this variation are examined in the Discussion.

167 Together with the measurements of the electrical unit size above, the confocal  
168 microscopy images in Figures 3 and 4 show that *arc6* chloroplasts possess giant thylakoids. This  
169 suggests that thylakoid division is dependent on chloroplast division.

### 170 **Incomplete formation of contractile rings result in giant thylakoids**

171  
172 To test the dependence of thylakoid division on the constriction of the outer contractile  
173 ring, we examined two chloroplast division mutants, *pdv1* and *pdv2*, which exhibit 2-6 gigantic  
174 chloroplasts that possess a dumbbell-like structure. These proteins reside in the outer envelope  
175 membrane and act as a functional pair to interact with Arc 5 and form the outer contractile ring.  
176 The *pdv* mutant chloroplasts are still able to form the inner contractile ring, however without the  
177 outer ring the plastids never divide (Miyagishima et al., 2006). We tested two alleles of each *pdv*



178 mutant, one that contained a mutation close to the N-terminus and another to the C- terminus  
179 which we labeled -1 and -2, respectively. On average, *pdv1-1*, *pdv1-2*, *pdv2-1*, and *pdv2-2* blebs  
180 (Figure 3C-F) were much larger than wild-type blebs. The blebs found in these mutants were  
181 slightly smaller than those found in the *arc6* mutant (~20  $\mu\text{m}$  vs ~22  $\mu\text{m}$ , Table 1).  
182 Representative z-projections show the *pdv* blebs in their entirety and provide further evidence  
183 that the blebs are much larger than those found in wild type (Figure 4C-F). The variations  
184 observed in bleb sizes for the wild type and *arc6* plants were evident in these mutants as well  
185 (Figure 5B).

186 To examine the behavior of thylakoids in a mutant that undergoes asymmetric plastid  
187 division we measured bleb sizes from an *arc3* mutant (Figure 3G) in which the inner contractile  
188 ring is misplaced (Pyke and Leech, 1994; Zhang et al., 2013). The *arc3* mutant plastids possess ~  
189 15 chloroplasts per cell (Burch-Smith et al., 2007). Here we expected the bleb sizes to average  
190 closer to those of the wild-type blebs, but with a larger variation, as an asymmetric division  
191 should result in one larger-than-wild-type and one smaller-than-wild-type chloroplast. As per  
192 these expectations, the *arc3* bleb sizes averaged 15.6  $\mu\text{m}$ , somewhat larger than the wild-type  
193 blebs, and displayed a standard deviation of  $\pm 6.5 \mu\text{m}$  (Table 1, Figure 5C). While we obtained a  
194 similar large standard deviation of bleb sizes from the giant chloroplast mutants, we note that  
195 blebs formed from the *arc3* mutants are only 22% larger than those from wild type plants, but  
196 display a 67% increase in the diameter standard deviation.

197

198 These results in aggregate reveal that thylakoids do not possess an independent division  
199 machinery and cannot divide if the chloroplasts cannot divide.

200

201 **Discussion:**

202 **Thylakoid division is dependent on the chloroplast division machinery**

203 Thylakoids represent a membrane system essential to shaping and maintaining the  
204 biosphere. Yet, the reproduction and partitioning of thylakoids, which must occur multiple times  
205 in green plants during each cell cycle, has so far escaped much scrutiny. In this work we have  
206 examined the question of whether thylakoids possess their own division machinery that operates  
207 independently of the chloroplast reproduction events.

208 In wild type plants it has been shown that each chloroplast possess a single thylakoid  
209 (Hesloparrison, 1963; Paolillo and Falk, 1966; Nierzwicki-Bauer et al., 1983; Schoenknecht et  
210 al., 1990; Shimoni et al., 2005; Mustardy et al., 2008; Austin and Staehelin, 2011; Daum and  
211 Kuhlbrandt, 2011). We reasoned that there are two possibilities for the structure of thylakoids  
212 found in plastid-division mutants. If the thylakoids are capable of dividing independently of  
213 chloroplast division, then the thylakoids in the plastid division mutants should be the same size  
214 as in wild-type chloroplasts. If, on the other hand, thylakoid division is dependent upon  
215 chloroplast division, then we would expect larger-than-wild-type thylakoids. We used two  
216 completely independent and unrelated methods to show that larger thylakoids are found in  
217 mutants that make giant chloroplasts. Changes in the conductivity of the thylakoid membrane in  
218 response to gramicidin addition can be used as a measure of relative thylakoid size  
219 (Schoenknecht et al., 1990). At any given ionophore concentration, it is expected that a larger  
220 vesicle would incorporate more gramicidin pores per vesicle than would a smaller one.  
221 Experimentally, this would be manifested as an increased sensitivity of the decay of the  
222 membrane potential to gramicidin. Using the amplitude of the carotenoid electrochromic signal  
223 at the end of a 9 ms illumination pulse as an indicator of the membrane conductivity, we found

224 that the *arc6* thylakoids were indeed considerably more sensitive to gramicidin addition in the  
225 manner suggested. From this we conclude that thylakoid vesicles in the *arc6* mutant are larger  
226 than those in the wild type. This would imply that the thylakoids cannot divide independently of  
227 plastid division.

228         It should also be noted that the ratio of gramicidin/chlorophyll required to accelerate the  
229 rate of electric field dissipation is higher in our studies than what was previously reported by  
230 (Schoenknecht et al., 1990). This discrepancy can be accounted for as a result of differences in  
231 thylakoid preparations. The thylakoids utilized in our studies were prepared by lysing intact  
232 chloroplasts within the same chamber that was carried out for taking the  $\Delta A_{520}$  nm  
233 measurements. As a result, the thylakoid samples contained additional chloroplast envelope  
234 membranes which absorbed gramicidin and increased the working gramicidin/chlorophyll ratio  
235 up to 50 fold (Nishio and Whitmarsh, 1991). Thus the higher gramicidin concentrations used in  
236 this study are to be expected. Additionally, differences in gramicidin's dimerization constants in  
237 thylakoids from different plant species can also contribute to this discrepancy (Schoenknecht et  
238 al., 1992). The difference in membrane permeability between the *arc6* and wild type thylakoids  
239 exhibited in Figure 2A-B may result from *arc6* thylakoids possessing naturally more ionically  
240 conductive membranes. It is also likely that the chloroplast solution used for the ECS  
241 measurements contained intact and broken chloroplasts which may have resulted in a slightly  
242 accelerated  $\Delta A_{520}$  nm decay due to the damage that the thylakoids may have sustained during the  
243 event that caused the lysis of the intact chloroplast. However, the sensitivity of the thylakoids  
244 towards increasing concentrations of gramicidin would not be expected to be due to the presence  
245 of lysed chloroplasts. Accordingly, our observation that the *arc6* thylakoids are more sensitive

246 towards increasing amounts of gramicidin indicates that the *arc6* thylakoids are larger than their  
247 wild type counter parts.

248 The sizes of osmotically lysed thylakoids from the different chloroplast division mutants  
249 provided an independent measurement of thylakoid structure. It is apparent that the thylakoids  
250 formed from *arc6* chloroplasts were considerably larger than wild-type blebs. The average  
251 diameter of the wild-type bleb was 12.8  $\mu\text{m}$ , whereas that of *arc6* blebs was 21.7  $\mu\text{m}$  (Table 1).  
252 Our similar findings with the *pdv1* and *pdv2* mutants suggests that thylakoid division is closely  
253 tied to the chloroplast division process (Table 1). The *arc6* chloroplasts are unable to form  
254 contractile rings, whereas the *pdv1* and *pdv2* mutants are capable of forming an inner contractile  
255 ring but only a partial outer ring. Our results suggest that separation of thylakoid membranes  
256 depends on the constriction forces applied by the chloroplast division machinery. The sizes of  
257 the *arc3* blebs show that thylakoid division is closely tied with the final stages of plastid division  
258 since the aberrant placement of the plastid ring leads to a rather large spread in thylakoid bleb  
259 sizes. Thus, our results from the bleb studies agree with the previously published electron  
260 microscopy images showing that thylakoid division occurs at the late stages of plastid division  
261 (Whatley, 1980; Robertson et al., 1996).

262 It is noteworthy that we observe a distribution of bleb sizes in our experiments (Figure 5),  
263 even in the wild type plants, the reasons for which may be manifold. First, the plastid division  
264 mutants we examined do not display giant chloroplasts in every cell type. Measurements of  
265 chloroplasts size found in the *arc6* guard cells made by (Pyke et al., 1994) and (Robertson et al.,  
266 1995) show that the *arc6* chloroplasts in the guard cells are smaller than the ones observed in  
267 mesophyll cells. Similarly, guard cells in *pdv* mutants also have smaller plastids compared to  
268 mesophyll cells (our observation). All cell types would have been in our preparations. Upon

269 reflection one sees that a small number of cells with a normal allotment of chloroplasts mixed in  
270 with a preponderance of cells containing one and or a few giant chloroplasts would lead to a  
271 skewed bleb size distribution, as seen in our experiments. Second, it is clear from the patchiness  
272 of the observed chlorophyll fluorescence that thylakoids do not unstack and unravel completely  
273 during bleb formation, and incompletely expanded thylakoids would form smaller blebs. This  
274 incomplete unfolding was not a consequence of short incubations in water, as neither did the  
275 observed patchiness decrease (not shown), nor did the bleb diameters increase with longer  
276 incubation times (Figure S1). Third, while we made every effort to be gentle with the samples,  
277 we cannot be sure that we did not cause some breakage of the blebs during handling. We would  
278 expect osmotically swollen vesicles to be more fragile than normal thylakoids, and any such  
279 breakage would necessarily result in the formation of smaller blebs. Fourth, budding as an  
280 alternative plastid division mechanism has been observed in the tomato *suffulta* mutant (Chen et  
281 al., 2009), and *Bryophyllum pinatum* (Kulandaivelu and Gnanam, 1985). In a study that targeted  
282 GFP to the stroma of *arc6* mutant chloroplasts, small vesicular bodies that contained GFP were  
283 suggested to have budded off of the giant chloroplasts (Forth and Pyke, 2006). Such buds would  
284 be expected to contain smaller thylakoid vesicles. Finally, there is inherent variability in our  
285 samples. Wild type *Arabidopsis* cells do not always contain 100 chloroplasts, *arc6* mutant cells  
286 do not always contain one chloroplast, and *pdv1* mutant cells do not always contain three  
287 chloroplasts. Instead, these are averages. Thus we would expect some variability in bleb sizes  
288 even if the other factors mentioned above were not in play. We hold that the fact that we see any  
289 giant blebs at all in giant chloroplast mutants provides strong evidence that thylakoid division  
290 and chloroplast replication are not independent and uncoupled events.

291

## 292 **Thylakoid division mechanism**

293           We propose that the constriction of the envelope membrane by the chloroplast division  
294 machinery acts to partition portions of the thylakoid into the two different poles of the dividing  
295 organelle. To reach this stage wherein a small portion of the thylakoid vesicle is trapped in the  
296 central isthmus of the dividing chloroplast, proteins that are known to be involved in thylakoid  
297 formation and remodeling, such as Vipp1, Thf1, FtsZ and FZL (Kroll et al., 2001; Wang et al.,  
298 2004; Gao et al., 2006; El-Kafafi et al., 2008; Lo and Theg, 2012), might be brought to bear on  
299 the thylakoid structure. These proteins have been proposed to govern the fission and fusion  
300 events accompanying stacking and unstacking of the thylakoid membrane in response to  
301 different light conditions (Chuartzman et al., 2008), and are thus candidates for those that might  
302 be involved in the final separation of the thylakoid vesicle into the two daughter plastids.  
303 Mesophyll cells in which the thylakoid protein FtsZ1, FtsZ2-2 and FZL has been knocked out  
304 possess fewer and larger chloroplasts compared to wild type cells (Gao et al., 2006; El-Kafafi et  
305 al., 2008; Karamoko et al., 2011), which suggests the involvement of thylakoid remodeling  
306 proteins during thylakoid division and also highlights the interdependence of both thylakoid and  
307 chloroplast division machineries for the complete fission of the daughter organelle. Our findings  
308 do not negate the possibility that other specific thylakoid division proteins are activated during a  
309 late stage of chloroplast division, but those proteins have yet to be identified. It appears more  
310 likely that the forces generated by the chloroplast envelope contractile rings are those that are  
311 responsible for dividing the thylakoid membrane as well. It will surely be interesting to elucidate  
312 through future studies the mechanism through which these forces generated on one membrane  
313 system are transduced to the other.

314

## 315 **Materials and Methods:**

### 316 **Plant material, protoplast and chloroplast isolation**

317 The Col-0 ecotype of *Arabidopsis thaliana* was used as the wild type. The chloroplast division  
318 mutants, *arc6* (SAIL\_693\_G04), *pdv1-1*, *pdv1-2*, *pdv2-1* (SALK\_059656), and *pdv2-2*  
319 (SAIL\_875E10) were kindly provided by Dr. KW Osteryoung. Landsberg Erecta *arc3* (CS264)  
320 seeds were obtained from ABRC. All plants were genotyped and only homozygous lines were  
321 used (see supplemental materials for further detail). All plants were grown for 5 weeks on  
322 Murashige and Skoog (Phytotechnologies, Santa Cruz, CA) agar before harvesting the tissue for  
323 chloroplasts (Theg and Tom, 2011); growth chamber conditions were 20°C with 16 hrs light  
324 cycle of 100  $\mu\text{mol photons/m}^2/\text{sec}$  at 60% humidity. Plant tissue was harvested following the  
325 procedure described previously (Fitzpatrick and Keegstra, 2001) with some minor modifications.  
326 Briefly, plants were minced in a petri dish and washed with digestion buffer (400 mM sorbitol,  
327 0.5mM  $\text{CaCl}_2$ , 20 mM Mes-KOH, pH 5.2). The minced plant tissue was then incubated with 0.05  
328 g/mL cellulase 'onozuka' R-10 and 0.01 g/mL macerozyme R-10 (Yakult Pharmaceutical Ind,  
329 Tokyo, Japan) for 3 hrs at room temperature with gentle rocking. Digested samples were passed  
330 through 4 layers of cheese cloth, and then centrifuged at 370 x g for 5 minutes at 4°C. The pellet  
331 was gently resuspended in resuspension buffer (400 mM sorbitol, 0.5mM  $\text{CaCl}_2$ , 20 mM Mes-  
332 KOH, pH 6.0). Samples were centrifuged again at 660 x g for 5 minutes at 4°C, and if blebs were  
333 to be formed, the pellet was resuspended in a minimal volume of resuspension buffer and kept on  
334 ice in the dark until further use.

335 For wild-type chloroplast isolation, the protoplast pellet from the wild-type plants was  
336 resuspended in breakage buffer (330 mM Sorbitol, 5 mM EDTA, 5 mM EGTA, 10 mM  
337  $\text{NaHCO}_3$ , 0.1% BSA, 20 mM Tris-KOH, pH 8.4) and passed through 20  $\mu\text{m}$  and 10  $\mu\text{m}$  mesh

338 through a syringe 4 times. For *arc6* chloroplast isolation, the protoplast pellet from the *arc6*  
339 tissues was resuspended in breakage buffer and incubated for 5 minutes on ice in the dark. Both  
340 samples were then passed through a Percoll gradient containing half volume of Percoll and half  
341 volume of grinding buffer (330 mM Sorbitol, 1 mM MgCl<sub>2</sub>, 1 mM MnCl<sub>2</sub>, 2 mM EDTA, 0.1%  
342 BSA, 50 mM Hepes-KOH, pH 7.3) at 8035 x g at 4°C. Intact chloroplasts were removed from  
343 the bottom band, and washed with a storage buffer (330 mM Sorbitol, 50 mM Hepes-KOH, pH  
344 8). Chloroplasts were centrifuged at 1475 x g at 4°C for 5 min. This step was repeated again to  
345 remove the remaining Percoll. After chlorophyll determination (Arnon, 1949), isolated  
346 chloroplasts were stored in the storage buffer on ice in the dark until used.

347

#### 348 **Electrochromic shift measurements**

349 All electrochromic shift measurements contained 0.02 µg/µL chlorophyll concentration, 1 mM  
350 methyl viologen, and various amounts of gramicidin D (Sigma-Aldrich, St. Louis, Missouri);  
351 measurements were performed in 1.2 mL of storage buffer. Gramicidin stock solutions were  
352 prepared in ethanol; the total percentage of ethanol did not exceed 0.03% for all titrations. The  
353 measurements typically began with the addition of chloroplasts into a 2.5 ml polystyrene cuvette  
354 (Fisher Scientific, Houston, Texas) containing a master mix of methyl viologen, storage buffer  
355 and gramicidin. Samples were mixed with a stir bar for 2 minutes at room temperature, and then  
356 transferred into a 1.5 mL Polystyrene cuvette (Fisher Scientific, Houston, Texas) with a 10 mm  
357 path length. The absorbance readings were performed using a JTS-10 LED pump-probe  
358 spectrometer (Bio-Logic SAS, Claix, France). All 520 nm absorption measurements consisted of  
359 a 1 sec dark baseline followed by a 9 ms actinic pulse; the relaxation kinetics were followed out  
360 to 4 sec.



361

### 362 **Thylakoid bleb formation**

363 Blebs were formed by diluting isolated protoplasts containing 2 $\mu$ g of chlorophyll into 2 mL of  
364 doubly distilled water stored at 4 $^{\circ}$ C, and incubated on ice in the dark on ice for 1 hr before  
365 images were taken. Equal volumes of sample were loaded into a homemade perfusion chamber  
366 consisting of 1.8 mm x 100 mm x 1.1 mm piece of polycarbonate and a 50 x 22 mm coverslip  
367 (Fisher Scientific Houston, TX) which had been coated with poly-L-lysine (Sigma-Aldrich St.  
368 Louis, MO). Samples were centrifuged for 15 minutes at 60 x *g* using a GS-6KR swinging  
369 bucket centrifuge (Beckman Coulter Inc., Brea, CA) at 10 $^{\circ}$ C and imaged.

370

### 371 **Microscopy**

372 Phase contrast microscopy was performed with a Zeiss Standard 25 ICS microscope. Images at  
373 160x magnification were taken by placing a camera, Canon powershot A620 (Canon, Melville,  
374 New York), into the ocular eyepiece. Fluorescence microscopy was performed using a Zeiss  
375 LSM 710 confocal microscope (Zeiss, Oberkochen, Germany). Image compilation and analysis  
376 were performed using Fiji software. Bleb diameters were measured from populations of isolated  
377 blebs taken from protoplast isolation preparations. The reported bleb diameter size were  
378 determined by scanning through the z-stack and finding the maximal diameter of the bleb. All  
379 reported values for bleb diameters were determined as being the largest distance from one end of  
380 the membrane to the other throughout the entire z-axis per bleb.

381

### 382 **Supplemental Material**

383

384 **Figure S1.** Thylakoid blebbing time course

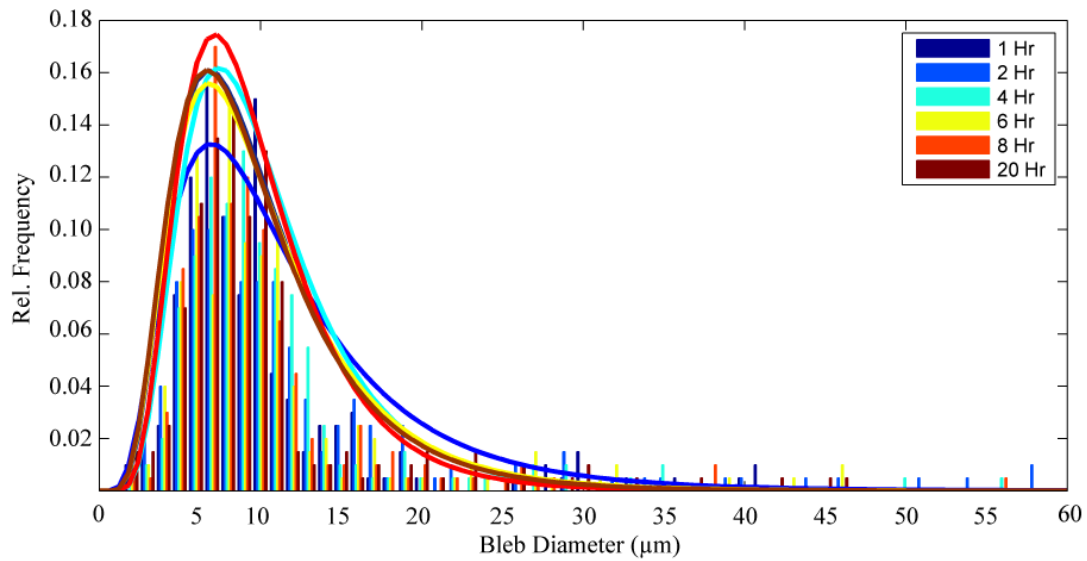

386 **Figure S1.** Thylakoid blebbing time course

387 A histogram reporting the frequency of bleb diameter sizes from a mixture of *arc6* and wild type  
388 samples over the course of 20 hours. (n=200 for all time points) The plots were fit with a log-  
389 normal distribution function.

390

391 **Table S1.** Table displaying the primers utilized to genotype plants from the T-DNA insertion  
392 lines, *arc6*, and *pdv2 -1*, *pdv2-2*.  
393 Plants from the T-DNA insertion lines, *arc6*, and *pdv2 -1*, *pdv2-2*, were genotyped using the  
394 following primers:

| Genotype      | 5' - 3' Primer Sequence                      |
|---------------|----------------------------------------------|
| <i>arc6</i>   | FP: ATCAGCAACGGACATTTCAAC                    |
| <i>arc6</i>   | RP: TAAATGGTTTAAGCGGTGTGC                    |
| <i>arc6</i>   | SAIL LB1: GCCTTTTCAGAAATGGATAAATAGCCTTGCTTCC |
| <i>pdv2-1</i> | FP: AATACTTGTCTCTCTTCTCTTCCCCACCA            |
| <i>pdv2-1</i> | RP: ATACTACTCAAATGAATCTCTCCCTCATCCA          |
| <i>pdv2-1</i> | SALK LB1.3: ATTTTGCCGATTTGGAAC               |
| <i>pdv2-2</i> | FP: CAGCTTGCTTCTTTACAGGTTTGAACCAA            |
| <i>pdv2-2</i> | RP: ATACTACTCAAATGAATCTCTCCCTCATCCA          |
| <i>pdv2-2</i> | SAIL LB1: GCCTTTTCAGAAATGGATAAATAGCCTTGCTTCC |

395

396

397 **Table S2.** Table displaying the primers utilized to genotype *Pdv1-1*, *pdv1-I*, and *arc3* plants by  
398 detecting single nucleotide polymorphisms.

399

| Genotype      | 5' - 3' Primer Sequence                | Digestion Enzyme |
|---------------|----------------------------------------|------------------|
| <i>pdv1-1</i> | FP: AATCTCATCGCTAAGCTTGTCATGTAGAGC     | SacI             |
| <i>pdv1-1</i> | RP: TTTTTTGTGTTGTGTCAATGAAATGGGAGAAA   | SacI             |
| <i>pdv1-2</i> | FP: ACGTGTAGACAAGTTCGATCTCTGGTGTTAA    | HpaI             |
| <i>pdv1-2</i> | RP: GCAGAAGAAAGAAGACAGATTCTACAGAAGCC   | HpaI             |
| <i>arc3</i>   | FP: AACAAAACCTTGTTTCATTTGTCTTGCAGGGGTG | HphI             |
| <i>arc3</i>   | RP: GGCCTTCGCCACTGGCTTTTCCTTTCCAGA     | HphI             |

400

401

402

403 **Acknowledgements:**

404 We would like to thank Dr. Katherine W. Osteryoung for providing us with *arc6*, *pdv1-1*, *pdv1-*  
405 *2*, *pdv2-1*, and *pdv2-2 Arabidopsis* seeds, Drs. Bo Liu and Yuh-Ru Julie Lee for providing access  
406 to their phase contrast microscope and for sharing their expertise in confocal microscopy. We  
407 would also like to thank Drs. Lan-Xin Shi and Li Liu for their expertise in plant tissue culture.  
408 This work was funded by the Division of Chemical Sciences, Geosciences, and Biosciences,  
409 Office of Basic Energy Sciences of the US Department of Energy through Grant DE-FG02-  
410 03ER15405.

411

412

413

414

415

416

417

418

419 **Table 1. Bleb Dimensions**

420

421

| <b>Genotype</b>       | <b>Diameter (<math>\mu\text{m}</math>)</b> |
|-----------------------|--------------------------------------------|
| <b>wild type</b>      | $12.8 \pm 3.9$                             |
| <b><i>arc6</i></b>    | $21.7 \pm 11.2$                            |
| <b><i>pdv1-1</i>*</b> | $19.5 \pm 8.6$                             |
| <b><i>pdv1-2</i>*</b> | $20.1 \pm 8.8$                             |
| <b><i>pdv2-1</i>*</b> | $18.9 \pm 6.9$                             |
| <b><i>pdv2-2</i>*</b> | $19.8 \pm 7.8$                             |
| <b><i>arc3</i></b>    | $15.6 \pm 6.5$                             |

422

*For all samples n= 1,000*

423 **Table 1. Bleb Dimensions**

424 A table reporting the average bleb diameters and standard deviations for all genotypes. All  
425 values reported were statistically significant ( $P < 0.05$ ) from a student's t-test other than those  
426 annotated with an (\*). Samples annotated with (\*) are not statistically significant from each other  
427 ( $P > 0.05$ ).

428 **Ho et al. Figure 1**

429

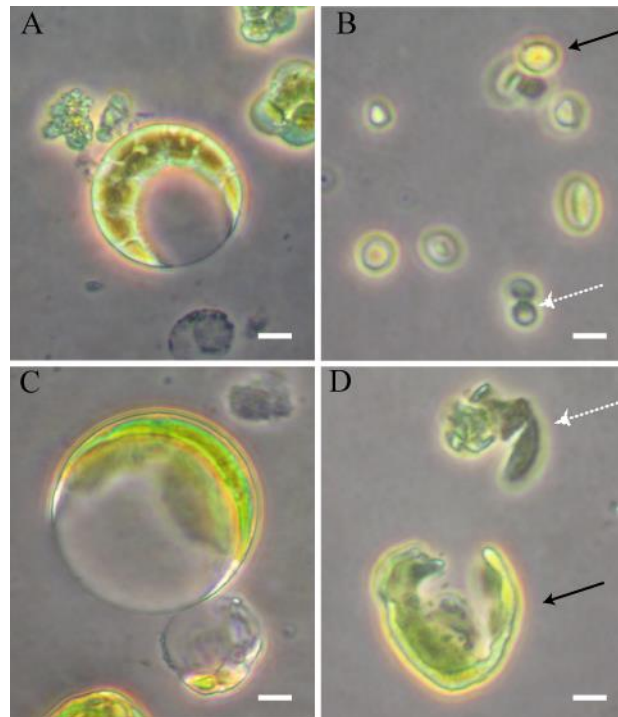

430

431

432 **Figure 1.** Isolation of intact chloroplasts.

433 A) and C), Isolated protoplasts from wild type and *arc6 Arabidopsis* under a phase contrast

434 microscope. B) and D), Wild type and *arc6* isolated chloroplasts. Intact chloroplasts possess a

435 halo and are highlighted by the black arrow; broken chloroplasts are indicated by the white

436 arrow. Scale bar corresponds to 10  $\mu$ m.

437

438

439 **Ho et al Figure 2**

440

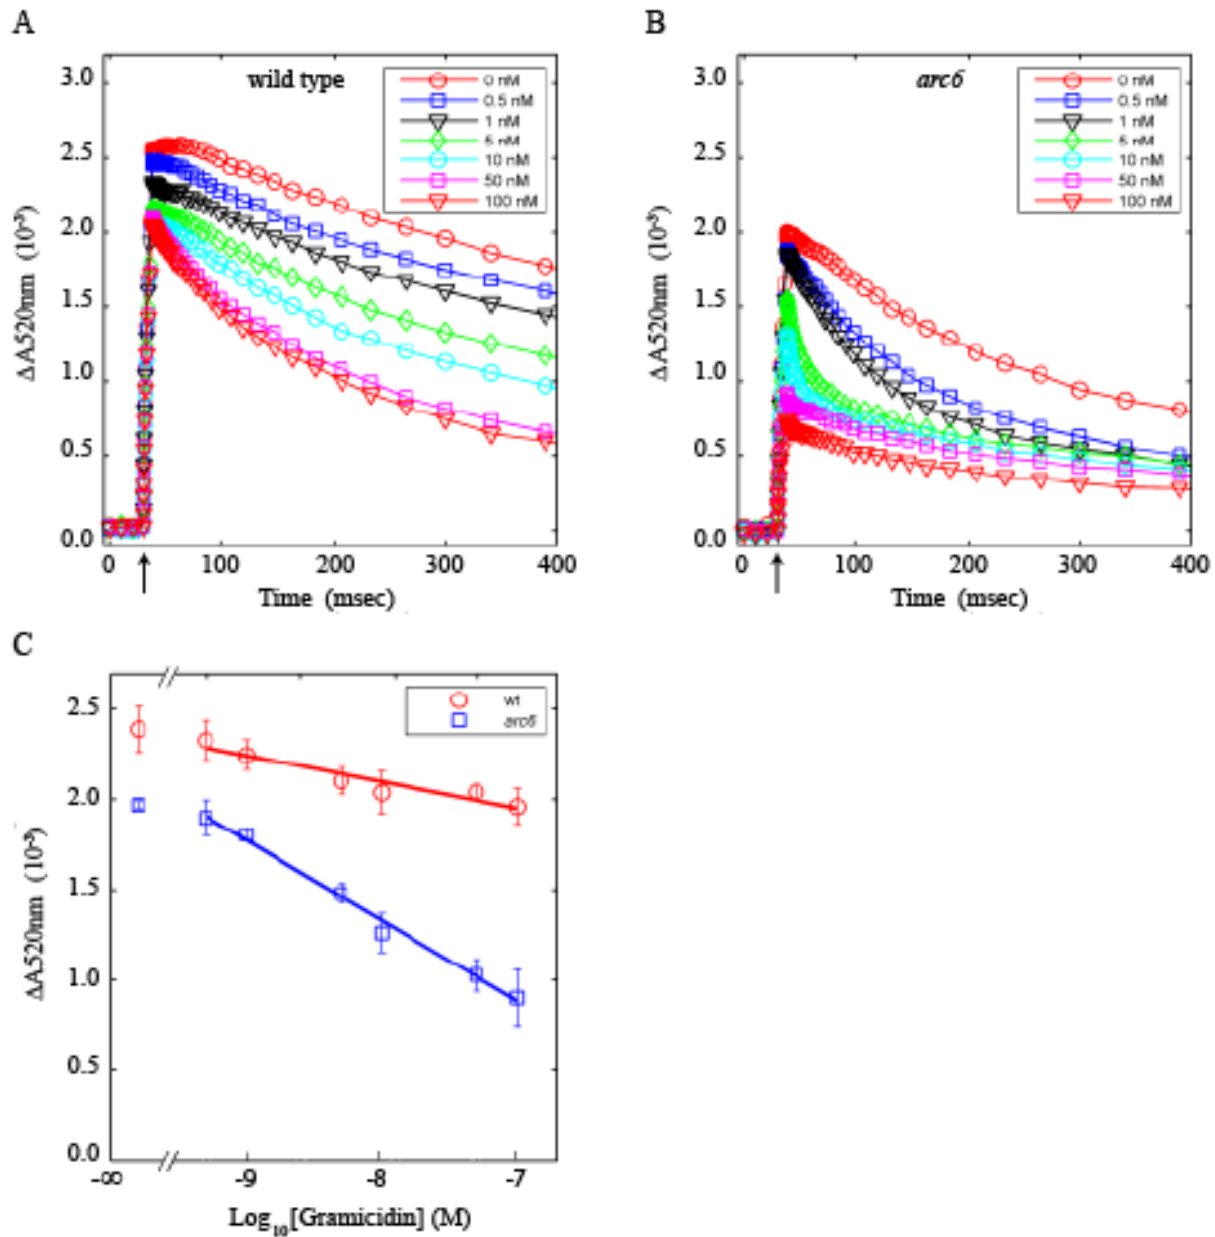

441

442 **Figure 2.** Thylakoid membrane conductivity measured by the electrochromic shift of

443 carotenoids.

444 Representative  $\Delta A_{520\text{nm}}$  measurements of A) wild-type and B) *arc6* chloroplasts with

445 increasing amounts of gramicidin; the arrow indicates the initiation of the 9 ms actinic flash. C)



446 Plot of the first point of the  $\Delta A_{520}$  nm signal after the 9 ms actinic flash vs. the log of gramicidin  
447 concentration. Bars indicate standard deviation of  $n=9$  for each data point. The wild-type (red  
448 circles) and *arc6* (blue squares) data points fit by linear regression; the  $\Delta A_{520}$  nm values for 0 nM  
449 gramicidin values are plotted to the left of the axis break and not utilized in the fit.  
450  
451

452 **Ho et al. Figure 3**

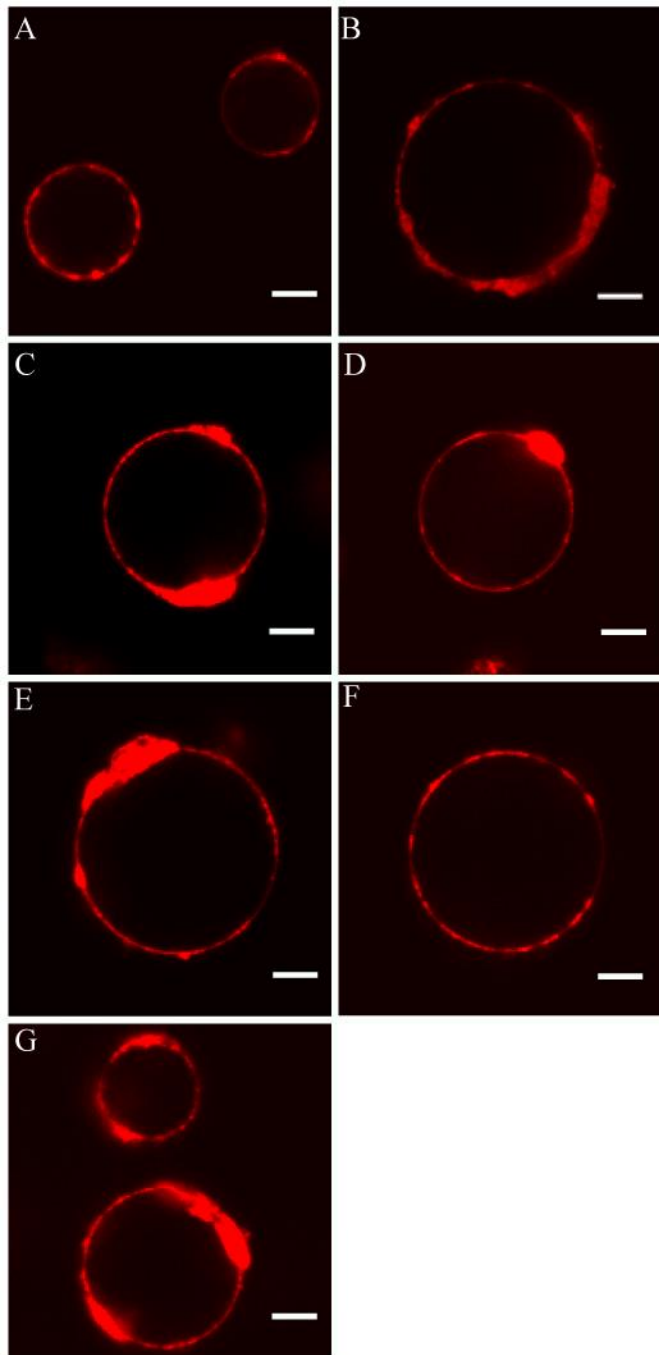

453

454

455 **Figure 3.** Chloroplast division mutants contain thylakoids that are much larger than those in

456 wild-type plants.

457 A-G) Representative cross-sections of osmotically swollen thylakoids from wild-type, *arc6*,  
458 *pdv1-1*, *pdv1-2*, *pdv2-1*, *pdv2-2*, and *arc3* plants, respectively, were taken using a laser scanning  
459 confocal microscope. Chlorophyll autofluorescence is used to track the presence of the thylakoid  
460 membrane. The scale bar corresponds to 10  $\mu\text{m}$ .

461

462

463 **Ho et al. Figure 4**

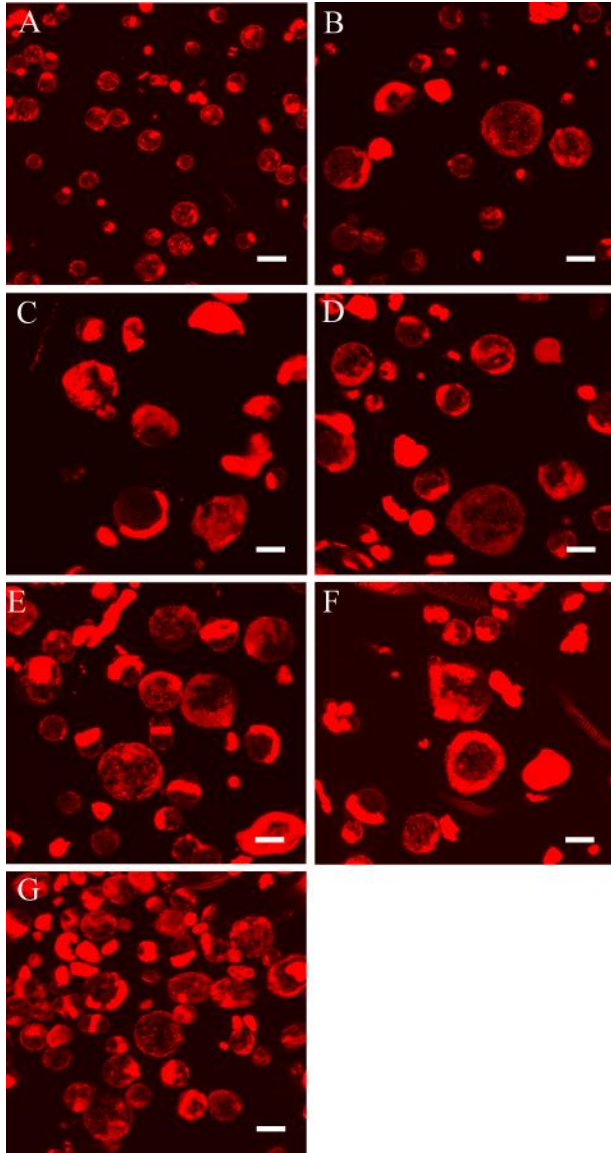

464

465

466 **Figure 4.** Z-projections of various thylakoid division mutants

467 Representative z- projections of osmotically swollen thylakoids from A) wild-type, B) *arc6*, C)

468 *pdv1-1*, D) *pdv1-2*, E) *pdv2-1*, F) *pdv2-2*, and G) *arc3* plants were taken using a laser scanning

469 confocal microscope. The scale bar corresponds to 20  $\mu$ m.

470

471 **Ho et al. Figure 5**

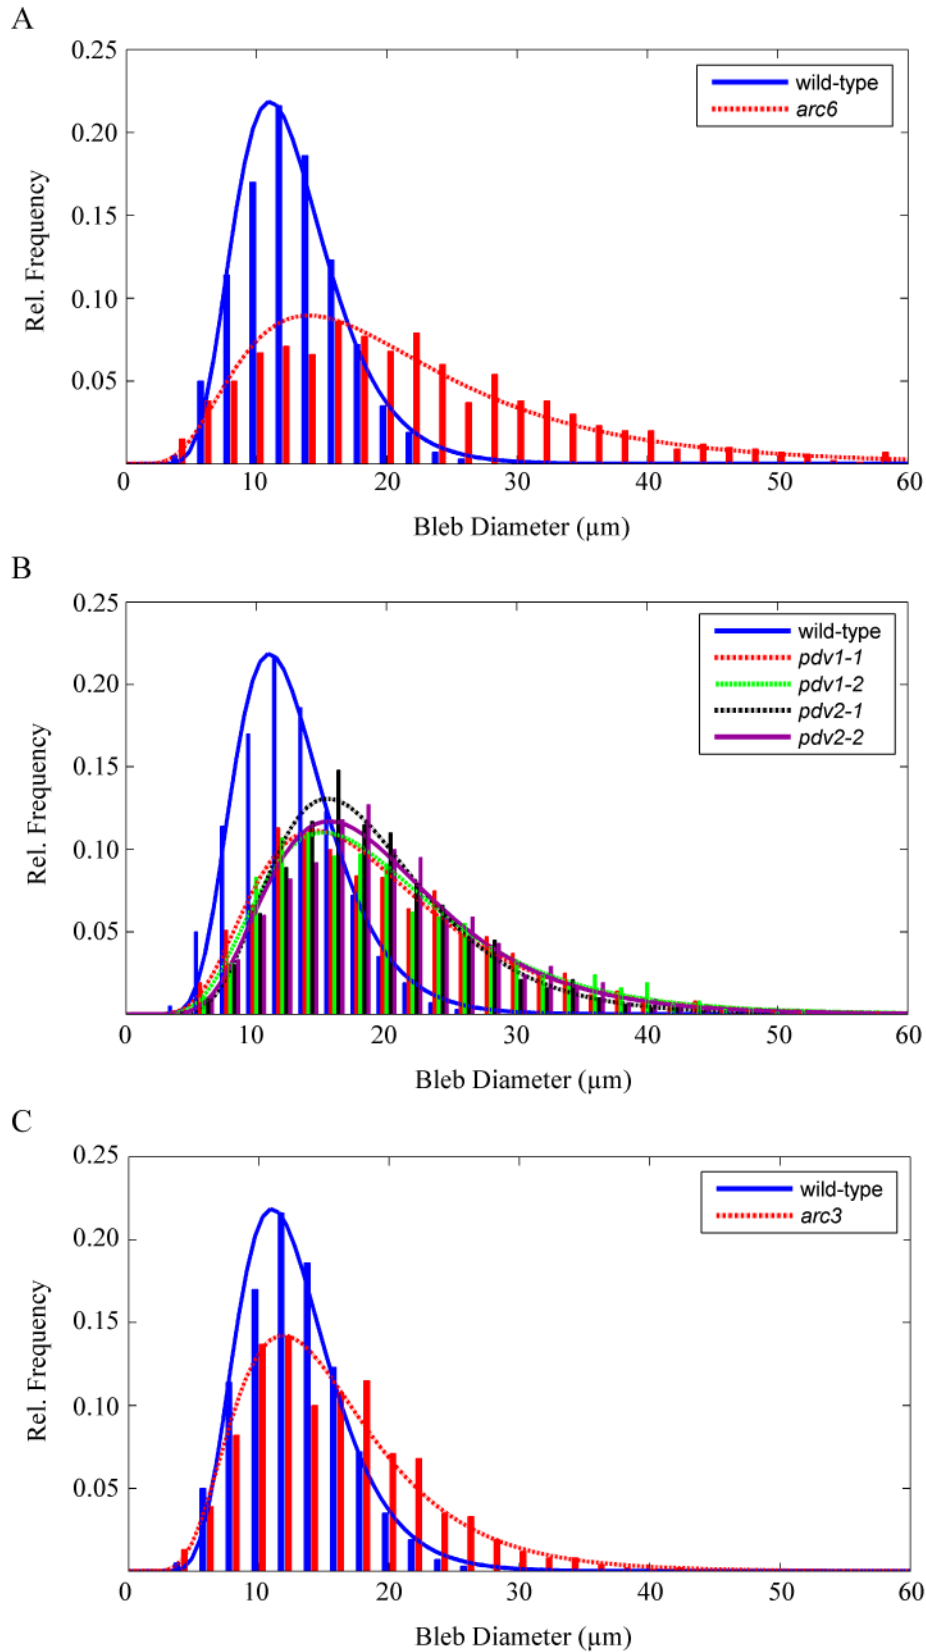

472

473

474 **Figure 5.** Thylakoid bleb population size distribution histogram

475 A) A histogram comparing the frequency of bleb diameter sizes between the wild type and A)  
476 *arc6* , B) all *pdv* mutants, and C) *arc3* plants (n=1,000 for all genotypes). The plots were fit with  
477 a log-normal distribution function.

478

479

480

481 **References:**

- 482 **Arnon DI** (1949) Copper Enzymes in Isolated Chloroplasts. Polyphenoloxidase in Beta Vulgaris. *Plant*  
483 *Physiol* **24**: 1-15
- 484 **Austin JR, 2nd, Staehelin LA** (2011) Three-dimensional architecture of grana and stroma thylakoids of  
485 higher plants as determined by electron tomography. *Plant Physiol* **155**: 1601-1611
- 486 **Bailleul B, Cardol P, Breyton C, Finazzi G** (2011) Electrochromism: a useful probe to study algal  
487 photosynthesis (vol 106, pg 179, 2010). *Photosynthesis Research* **110**: 151-152
- 488 **Boardman NK, Thorne SW, Anderson JM** (1966) Fluorescence Properties of Particles Obtained by  
489 Digitonin Fragmentation of Spinach Chloroplasts. *Proceedings of the National Academy of*  
490 *Sciences of the United States of America* **56**: 586-&
- 491 **Boekema EJ, van Breemen JFL, van Roon H, Dekker JP** (2000) Arrangement of photosystem II  
492 supercomplexes in crystalline macrodomains within the thylakoid membrane of green plant  
493 chloroplasts. *Journal of Molecular Biology* **301**: 1123-1133
- 494 **Burch-Smith TM, Schiff M, Caplan JL, Tsao J, Czymbek K, Dinesh-Kumar SP** (2007) A novel role for the  
495 TIR domain in association with pathogen-derived elicitors. *Plos Biology* **5**: 501-514
- 496 **Chen YL, Asano T, Fujiwara MT, Yoshida S, Machida Y, Yoshioka Y** (2009) Plant Cells Without Detectable  
497 Plastids are Generated in the crumpled leaf Mutant of *Arabidopsis thaliana*. *Plant and Cell*  
498 *Physiology* **50**: 956-969
- 499 **Chuartzman SG, Nevo R, Shimoni E, Charuvi D, Kiss V, Ohad I, Brumfeld V, Reich Z** (2008) Thylakoid  
500 membrane remodeling during state transitions in *Arabidopsis*. *Plant Cell* **20**: 1029-1039
- 501 **Daum B, Kuhlbrandt W** (2011) Electron tomography of plant thylakoid membranes. *Journal of*  
502 *Experimental Botany* **62**: 2393-2402
- 503 **Daum B, Nicastro D, Il JA, McIntosh JR, Kuhlbrandt W** (2010) Arrangement of Photosystem II and ATP  
504 Synthase in Chloroplast Membranes of Spinach and Pea. *Plant Cell* **22**: 1299-1312
- 505 **El-Kafafi ES, Karamoko M, Pignot-Paintrand I, Grunwald D, Mandaron P, Lerbs-Mache S, Falconet D**  
506 (2008) Developmentally regulated association of plastid division protein FtsZ1 with thylakoid  
507 membranes in *Arabidopsis thaliana*. *Biochemical Journal* **409**: 87-94
- 508 **Fitzpatrick LM, Keegstra K** (2001) A method for isolating a high yield of *Arabidopsis* chloroplasts capable  
509 of efficient import of precursor proteins. *Plant J* **27**: 59-65
- 510 **Forth D, Pyke KA** (2006) The suffulta mutation in tomato reveals a novel method of plastid replication  
511 during fruit ripening. *J Exp Bot* **57**: 1971-1979
- 512 **Gao H, Sage TL, Osteryoung KW** (2006) FZL, an FZO-like protein in plants, is a determinant of thylakoid  
513 and chloroplast morphology. *Proc Natl Acad Sci U S A* **103**: 6759-6764
- 514 **Glynn JM, Froehlich JE, Osteryoung KW** (2008) *Arabidopsis* ARC6 coordinates the division machineries  
515 of the inner and outer chloroplast membranes through interaction with PDV2 in the  
516 intermembrane space. *Plant Cell* **20**: 2460-2470
- 517 **Heslopharrison J** (1963) Structure and morphogenesis of lamellar systems in grana-containing  
518 chloroplasts. *Planta* **60**: 243-260
- 519 **Heslopharrison J** (1963) Structure and Morphogenesis of Lamellar Systems in Grana-Containing  
520 Chloroplasts .1. Membrane Structure and Lamellar Architecture. *Planta* **60**: 243-260
- 521 **Hinnah SC, Wagner R** (1998) Thylakoid membranes contain a high-conductance channel. *European*  
522 *Journal of Biochemistry* **253**: 606-613

- 523 **Junge W, Witt HT** (1968) On Ion Transport System of Photosynthesis - Investigations on a Molecular  
524 Level. *Zeitschrift Fur Naturforschung Part B-Chemie Biochemie Biophysik Biologie Und*  
525 *Verwandten Gebiete* **B 23**: 244-&
- 526 **Karamoko M, El-Kafafi ES, Mandaron P, Lerbs-Mache S, Falconet D** (2011) Multiple FtsZ2 isoforms  
527 involved in chloroplast division and biogenesis are developmentally associated with thylakoid  
528 membranes in Arabidopsis. *Febs Letters* **585**: 1203-1208
- 529 **Kroll D, Meierhoff K, Bechtold N, Kinoshita M, Westphal S, Vothknecht UC, Soll J, Westhoff P** (2001)  
530 VIPP1, a nuclear gene of Arabidopsis thaliana essential for thylakoid membrane formation. *Proc*  
531 *Natl Acad Sci U S A* **98**: 4238-4242
- 532 **Kulandaivelu G, Gnanam A** (1985) Scanning Electron-Microscopic Evidence for a Budding Mode of  
533 Chloroplast Multiplication in Higher-Plants. *Physiologia Plantarum* **63**: 299-302
- 534 **Leech RM, Thomson WW, Plattaloia KA** (1981) Observations on the Mechanism of Chloroplast Division  
535 in Higher-Plants. *New Phytologist* **87**: 1-&
- 536 **Lo SM, Theg SM** (2012) Role of Vesicle-Inducing Protein in Plastids 1 in cpTat transport at the thylakoid.  
537 *Plant J*
- 538 **Maple-Grodem J, Raynaud C** (2014) Plastid Division. *In* SM Theg, FA Wollman, eds, *Plastid Biology*.  
539 Springer, New York, pp 155-188
- 540 **McAndrew RS, Froehlich JE, Vitha S, Stokes KD, Osteryoung KW** (2001) Colocalization of plastid division  
541 proteins in the chloroplast stromal compartment establishes a new functional relationship  
542 between FtsZ1 and FtsZ2 in higher plants. *Plant Physiology* **127**: 1656-1666
- 543 **Mercer FV, Hodge, A.J., Hope, A.B., Mclean, J. D.** (1954) The Structure and Swelling Properties of Nitella  
544 Chloroplasts. *Australian Journal of Biological Sciences* **8**: 1-18
- 545 **Miyagishima SY, Froehlich JE, Osteryoung KW** (2006) PDV1 and PDV2 mediate recruitment of the  
546 dynamin-related protein ARC5 to the plastid division site. *Plant Cell* **18**: 2517-2530
- 547 **Mustardy L, Buttle K, Steinbach G, Garab G** (2008) The Three-Dimensional Network of the Thylakoid  
548 Membranes in Plants: Quasihelical Model of the Granum-Stroma Assembly. *Plant Cell* **20**: 2552-  
549 2557
- 550 **Mustardy LA, Janossy AGS** (1979) Evidence of helical thylakoid arrangement by scanning electron  
551 microscopy. *Plant Sci. Lett.* **16**: 281-284
- 552 **Nierzwicki-Bauer SA, Balkwill DL, Stevens SE, Jr.** (1983) Three-dimensional ultrastructure of a unicellular  
553 cyanobacterium. *J Cell Biol* **97**: 713-722
- 554 **Nishio JN, Whitmarsh J** (1991) Dissipation of the Proton Electrochemical Potential in Intact and Lysed  
555 Chloroplasts .1. The Electrical Potential. *Plant Physiology* **95**: 522-528
- 556 **Oross JW, Possingham JV** (1989) Ultrastructural Features of the Constricted Region of Dividing Plastids.  
557 *Protoplasma* **150**: 131-138
- 558 **Osteryoung KW, Pyke KA** (2014) Division and dynamic morphology of plastids. *Annu Rev Plant Biol* **65**:  
559 443-472
- 560 **Paolillo D, Falk R** (1966) The ultrastructure of grana in mesolhyll plastids of Zea mays. *Am J Botany* **53**:  
561 173-180
- 562 **Pyke KA, Leech RM** (1994) A Genetic-Analysis of Chloroplast Division and Expansion in Arabidopsis-  
563 Thaliana. *Plant Physiology* **104**: 201-207
- 564 **Pyke KA, Rutherford SM, Robertson EJ, Leech RM** (1994) Arc6, a Fertile Arabidopsis Mutant with Only 2  
565 Mesophyll Cell Chloroplasts. *Plant Physiology* **106**: 1169-1177
- 566 **Robertson EJ, Pyke KA, Leech RM** (1995) Arc6, an Extreme Chloroplast Division Mutant of Arabidopsis  
567 Also Alters Proplastid Proliferation and Morphology in Shoot and Root Apices. *Journal of Cell*  
568 *Science* **108**: 2937-2944
- 569 **Robertson EJ, Rutherford SM, Leech RM** (1996) Characterization of chloroplast division using the  
570 Arabidopsis mutant arc5. *Plant Physiology* **112**: 149-159



- 571 **Schoenknecht G, Althoff G, Junge W** (1990) The electric unit size of thylakoid membranes. *FEBS Lett.*  
572 **277**: 65-68
- 573 **Schoenknecht G, Althoff G, Junge W** (1992) Dimerization constant and single-channel conductance of  
574 gramicidin in thylakoid membranes. *Journal of Membrane Biology* **126**: 265-275
- 575 **Shimoni E, Rav-Hon O, Ohad I, Brumfeld V, Reich Z** (2005) Three-dimensional organization of higher-  
576 plant chloroplast thylakoid membranes revealed by electron tomography. *Plant Cell* **17**: 2580-  
577 2586
- 578 **Theg SM, Tom C** (2011) Measurement of the DeltapH and electric field developed across Arabidopsis  
579 thylakoids in the light. *Methods Mol Biol* **775**: 327-341
- 580 **van Roon H, van Breemen JFL, de Weerd FL, Dekker JP, Boekema EJ** (2000) Solubilization of green plant  
581 thylakoid membranes with n-dodecyl-alpha,D-maltoside. Implications for the structural  
582 organization of the Photosystem II, Photosystem I, ATP synthase and cytochrome b(6)f  
583 complexes. *Photosynthesis Research* **64**: 155-166
- 584 **Vitha S, Froehlich JE, Koksharova O, Pyke KA, van Erp H, Osteryoung KW** (2003) ARC6 is a J-domain  
585 plastid division protein and an evolutionary descendant of the cyanobacterial cell division  
586 protein Ftn2. *Plant Cell* **15**: 1918-1933
- 587 **Wang Q, Sullivan RW, Kight A, Henry RL, Huang JR, Jones AM, Korth KL** (2004) Deletion of the  
588 chloroplast-localized Thylakoid formation1 gene product in Arabidopsis leads to deficient  
589 thylakoid formation and variegated leaves. *Plant Physiology* **136**: 3594-3604
- 590 **Weier TE, Stocking CR, Bracker CE, Risley EB** (1965) Structural Relationships of Internal Membrane  
591 Systems of in Situ and Isolated Chloroplasts of *Hordeum Vulgare*. *American Journal of Botany*  
592 **52**: 339-&
- 593 **Whatley JM** (1980) Plastid Growth and Division in *Phaseolus-Vulgaris*. *New Phytologist* **86**: 1-&
- 594 **Witt HT** (1979) Energy-Conversion in the Functional Membrane of Photosynthesis - Analysis by Light-  
595 Pulse and Electric Pulse Methods - Central Role of the Electric-Field. *Biochimica Et Biophysica*  
596 *Acta* **505**: 355-427
- 597 **Yoshida Y, Kuroiwa H, Misumi O, Nishida K, Yagisawa F, Fujiwara T, Nanamiya H, Kawamura F,**  
598 **Kuroiwa T** (2006) Isolated chloroplast division machinery can actively constrict after stretching.  
599 *Science* **313**: 1435-1438
- 600 **Zhang M, Schmitz AJ, Kadirjan-Kalbach DK, Terbush AD, Osteryoung KW** (2013) Chloroplast division  
601 protein ARC3 regulates chloroplast FtsZ-ring assembly and positioning in arabidopsis through  
602 interaction with FtsZ2. *Plant Cell* **25**: 1787-1802
- 603
